# Supplementary material
Source: PubMed Central journal article supplement (PMC2714723)
Supplement: ddp233_1.pdf [file ddp233_1.pdf]

| Patient | Chr Band | First Oligo Flanking Imbalance | First Oligo in imbalance | Last Oligo in imbalance | Last Oligo Flanking Imbalance | Minimum Size | Gain/Loss |
|---------|----------|--------------------------------|--------------------------|-------------------------|-------------------------------|--------------|-----------|
| 1       | 2q11.2   | 95796065                       | 95909077                 | 97380005                | 97630812                      | 1.47 Mb      | Gain      |
| 2       | 2q11.2   | 96017667                       | 96130287                 | 97380005                | 97630812                      | 1.25 Mb      | Loss      |
| 3       | 2q13     | 111085360                      | 111158601                | 112782250               | 112926944                     | 1.62 Mb      | Gain      |
| 4       | 2q13     | 111085360                      | 111158601                | 112782250               | 112926944                     | 1.62 Mb      | Gain      |
| 5       | 2q13     | 111085360                      | 111158601                | 112782250               | 112926944                     | 1.62 Mb      | Loss      |
| 6       | 2q13     | 111085360                      | 111158601                | 112782250               | 112926944                     | 1.62 Mb      | Loss      |
| 7       | 2q13     | 111085360                      | 111158601                | 112782250               | 112926944                     | 1.62 Mb      | Loss      |
| 8       | 7q11.21  | 64204448                       | 64247264                 | 64708354                | 64854541                      | 461 kb       | Loss      |
| 9       | 7q36.1   | 149588378                      | 149647886                | 152002289               | 152069872                     | 2.35 Mb      | Loss      |
| 10      | 17q23    | 55380588                       | 55527482                 | 57670085                | 57750550                      | 2.14 Mb      | Loss      |

**Supplemental Table 2.** Genomic coordinates for oligonucleotides immediately outside of the minimal region of imbalance, corresponding to Build 36.1 (hg18) of the human genome assembly.
