# Supplementary material
Source: PubMed Central journal article supplement (PMC2714723)
Supplement: ddp233_2.pdf [file ddp233_2.pdf]

| Patient           | Cognitive Features                                   | Growth Features                                                                                                                                               | Facial Features                                                                                  | Skeletal Features                                                                                                                          | Heart Features                                                       | Neurologic Features                                | Other Features                                                                |
|-------------------|------------------------------------------------------|---------------------------------------------------------------------------------------------------------------------------------------------------------------|--------------------------------------------------------------------------------------------------|--------------------------------------------------------------------------------------------------------------------------------------------|----------------------------------------------------------------------|----------------------------------------------------|-------------------------------------------------------------------------------|
| #1<br>2q11.2 gain | Moderate developmental delay                         | Short stature                                                                                                                                                 | Midface hypoplasia with hypoplastic nose                                                         | Macrocephaly with frontal bossing and dolichocephaly; significant shortening of all segments of the extremities, significant brachydactyly | NFE                                                                  | Hypotonia with continued head lag at age 15 months | None                                                                          |
| #2<br>2q11.2 loss | Learning disabilities, ADHD                          | Normal growth parameters                                                                                                                                      | U                                                                                                | Left lumbar scoliosis                                                                                                                      | Aortic coarctation requiring surgical repair                         | U                                                  | Café au lait spots                                                            |
| #3<br>2q13 gain   | Severe developmental delay                           | At 3 years 1 month: all growth parameters <5 <sup>th</sup> percentile                                                                                         | Prominent nose with bulbous nasal tip, unusual ear pit, dental crowding                          | Mild microcephaly with bitemporal narrowing, severe scoliosis, joint contractures involving hands, knees, and ankles                       | NFE                                                                  | Congenital hypomyelinating neuropathy, hypotonia   | Retinitis pigmentosa, bilateral cryptorchidism                                |
| #4<br>2q13 gain   | Mild developmental delay, apraxia, ADHD, and anxiety | At 13 years 9 months: weight 5 <sup>th</sup> -10 <sup>th</sup> percentile; height 50 <sup>th</sup> percentile; head circumference 10 <sup>th</sup> percentile | Small jaw and dental crowding, hypertelorism, broad nasal bridge, small mouth with arched palate | 5 <sup>th</sup> digit clinobrachydactyly                                                                                                   | Innocent heart murmur                                                | Tourette syndrome                                  | Primary IgG-2 subclass deficiency, mild unilateral sensorineural hearing loss |
| #5<br>2q13 loss   | NA                                                   | U                                                                                                                                                             | U                                                                                                | U                                                                                                                                          | Heterotaxy with multiple CHDs: TAPVR, VSD, PDA, coarctation of aorta | Sleep apnea, seizures                              |                                                                               |
| #6                | Severely impaired                                    | U                                                                                                                                                             | Mild face retraction, widely                                                                     | Broad feet with short toes                                                                                                                 | U                                                                    | U                                                  | U                                                                             |

|                    |                                                          |                                                                                                                           |                                                                                                                                                      |                                                                                                                                                                                  |                                       |                                                        |                                                  |
|--------------------|----------------------------------------------------------|---------------------------------------------------------------------------------------------------------------------------|------------------------------------------------------------------------------------------------------------------------------------------------------|----------------------------------------------------------------------------------------------------------------------------------------------------------------------------------|---------------------------------------|--------------------------------------------------------|--------------------------------------------------|
| 2q13 loss          | speech and language skills                               |                                                                                                                           | spaced teeth                                                                                                                                         |                                                                                                                                                                                  |                                       |                                                        |                                                  |
| #7<br>2q13 loss    | NA                                                       | IUGR                                                                                                                      | Dysmorphic facies: microcephaly, low-set ears, micrognathia, neck webbing                                                                            | Rocker-bottom feet, wide fingers and toes with small/absent nails, clenched hands with distal finger contractures                                                                | VSD and PFO                           | Agenesis of the corpus callosum, apnea, hypotonia      | Esophageal atresia, inguinal hernia, small penis |
| #8<br>7q11.21 loss | No indication provided                                   | U                                                                                                                         | U                                                                                                                                                    | U                                                                                                                                                                                | U                                     | U                                                      | U                                                |
| #9<br>7q36.1 loss  | Mild developmental delay                                 | Head circumference and weight in 5 <sup>th</sup> percentile                                                               | Low-set, posteriorly rotated ears, widely spaced eyes                                                                                                | U                                                                                                                                                                                | Normal cardiology evaluation with EKG | Generalized tonic-clonic seizures; normal head CT scan | U                                                |
| #10<br>17q23 loss  | Mild developmental delay, especially speech and language | Weight 10 <sup>th</sup> percentile; height 25-50 <sup>th</sup> percentile; head circumference 10 <sup>th</sup> percentile | Frontal bossing, curly hair without coarseness, stellate pattern to irides, rounded nasal tip, gap between 1 <sup>st</sup> and 2 <sup>nd</sup> teeth | Long fingers and toes; 2 <sup>nd</sup> toe overlaps 1 <sup>st</sup> and 3 <sup>rd</sup> toes on the R, 2 <sup>nd</sup> and 4 <sup>th</sup> toes overlap 3 <sup>rd</sup> on the L | NFE                                   | Hyperactivity, separation anxiety                      | None                                             |

“U” = information unavailable; “NFE” = not formally evaluated; “NA” = not able to assess due to young age; “CHD” = congenital heart defect; “TAPVR” = total anomalous pulmonary venous return; “VSD” = ventriculoseptal defect; “PDA” = patent ductus arteriosus; “IUGR” = intrauterine growth retardation; “PFO” = patent foramen ovale; “EKG” = electrocardiogram; “CT” = computed tomography; “GA” = gestational age; “R” = right; “L” = left

**Supplemental Table 3.** Phenotypic features of patients described in Table 1.
